# Supplementary material
Source: PubMed Central journal article supplement (PMC4808167)
Supplement: AAC.02427-15_zac004165008so1.pdf [file AAC.02427-15_zac004165008so1.pdf]

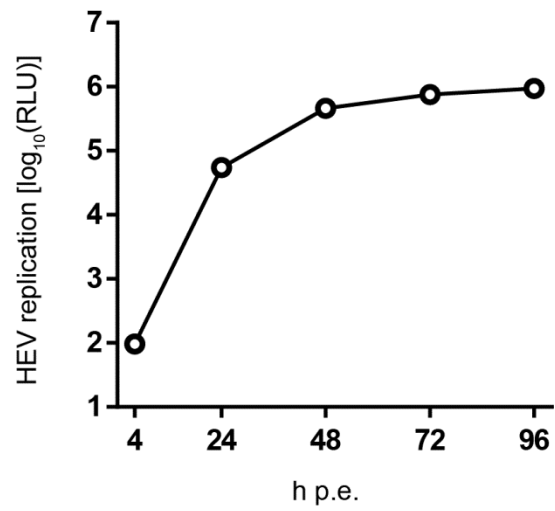

**Fig. S1**

**Time kinetics of HEV replication in Huh7.5 cells.** RLU of replicating HEV SGR was assessed 4 h, 24 h, 48 h, 72 h and 96 h post transfection.

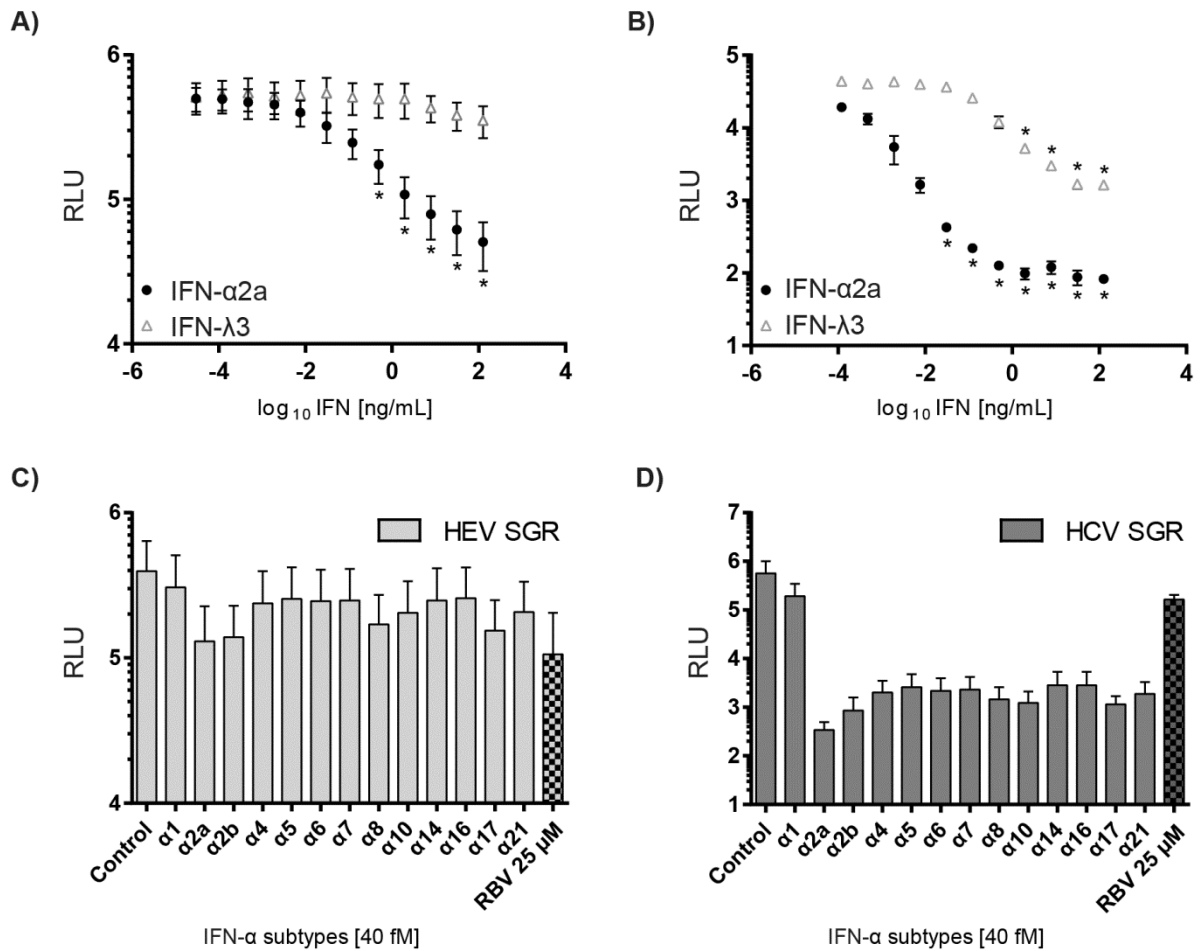

**Fig. S2**

**Raw RLU counts of selected assays.** The RLU counts of selected experiments are depicted for HEV SGR (A, C) and HCV SGR (B, D). The dose-dependent inhibition of HEV (A) and HCV (B) replication by IFN- $\alpha$ 2a and IFN- $\lambda$ 3 in Huh7.5 corresponds to Fig. 1, while the measuring window of the assay depicted in Fig. 3 is shown in C) and D). Shown are the means of three independent experiments (MV  $\pm$  SEM), asterisks represent significant reduction in RLU tested against untreated controls (Dunnett's t-test; \*  $p < 0.05$ ).
